# Supplementary material
Source: PubMed Central journal article supplement (PMC490015)

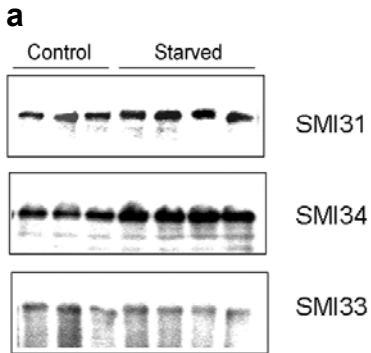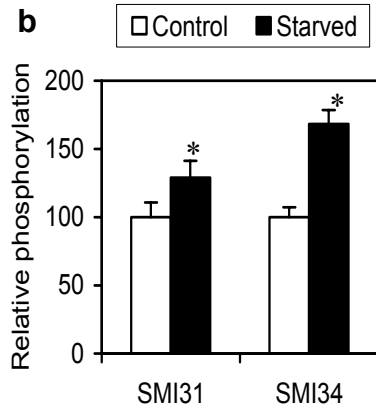

Supplement: pnas_101_29_10804__1.pdf [file pnas_101_29_10804__1.pdf]
